# Supplementary material
Source: Elsevier journal article supplement (https://www.sciencedirect.com/science/article/pii/S2387020620302278)
Supplement: mmc1 [file S2387020620302278:mmc1.docx]

**A. ESCALA DE FRAGILIDAD DE ROCKWOOD**

1. Hipertensión arterial (1= si; 0 =no)

2. Enfermedad renal crónica (creatina >1.3 or tasa de filtrado glomerular

<60)(1=yes;0=4no)

3. Enfermedad pulmonar obstructiva crónica (1=sí, 0=no)

4. Insuficiencia cardiaca (1=sí, 0=no)

5. Cancer((1=sí, 0=no)

6. Ictus (1=sí, 0=no)

7. Parkinson (1=sí, 0=no)

8. Fibrilación auricular (1=sí, 0=no)

9. Problemas gastrointestinales (1=sí, 0=no)

10. Enfermedades tiroideas (1=sí, 0=no)

11. Diabetes mellitus (1=sí, 0=no)

12. Alteraciones psiquiátricas (1=sí, 0=no)

13. Enfermedad gastrointestinal o hepática (1=sí, 0=no)

14. Enfermedades musculoesqueléticas(1=sí, 0=no)

15. Depresion (geriatric depression scale) (>0sí, 0=no)

16. Demencia (Mini-Mental State Examination) (<27/30)/Mini-

Cognitive Examination (<28/35) (1=sí, 0=no)

17. Malnutricion (Mini-Nutritional Assessment) <17 =si <17= no

18. Obesidad (indice de masa corporal >30 = 1, 25-30 =0.5, <25 = 0) 1

9. Estreñimiento (1=sí, 0=no)

20. Úlceras por presión (1=sí, 0=no)

21. Anemia (hemoglobina g/dL: <13 hombres; <12 mujeres) ((1=sí, 0=no)

22. Déficit visual (1=sí, 0=no)

23. Déficit auditivo ((1=sí, 0=no)

24. Velocidad de la marcha disminuida ((1=sí, 0=no)

25. Riesgo de caídas (Timed Up and Go) ((1=sí, 0=no)

26. Pérdida de peso no intencionada (1=sí, 0=no)

27. Dificultades para la ducha (1=sí, 0=no)

28. Dificultad para el vestido (1=sí, 0=no)

29. Dificultad para el aseo personal (1=sí, 0=no)

30. Dificultad para las transferencias (1=sí, 0=no)

31. Problemas de alimentación (1=sí, 0=no)

32. Incontinencia urinaria (1=sí, 0=no)

33. Incontinencia fecal (1=sí, 0=no)

34. Polifarmacia (>5) ((1=sí, 0=no)

**B. CRITERIOS DE FRIED IMPUTADOS (FI)**

Variables proxy empleadas para cada item para imputar los valores perdidos. El índice de Fried se genera empleado datos para completar los items.

- Pérdida de peso inintencionada: imputado utilizando el Mini-Nutritional Assessment como predictor.
- Fatigabilidad: imputado utilizando el índice de Barthel como predictor
- Debilidad (fuerza de prensión): imputado empleando el test de fuerza de prensión y el índe de Barthelcomo predictores
- Baja velocidad de la marcha: imputado empleando el índice de Barthel y alteraciones del equilibrio como predictores.
- Bajo nivel de actividad física: imputado empleando el índice de Barthel como predictor.
